# Supplementary material
Source: Springer Nature journal article supplement (https://www.springermedizin.de/resource/supplementary/12962_2009_122_MOESM7_ESM.pdf/9572206)
Supplement: MOESM7 [file 9572206]

Records of reviews & protocols  
containing economic terms:

n = 3,270

Abstracts retrieved for further  
screening:

n = 194

Records of reviews with usable  
information:

n = 32

Records to be reviewed:

n = 16

Records of reviews excluded  
because the abstract did not  
include economic references or  
comparison of 2+ prostheses:

n = 3,076

Records excluded following  
inspection of full-text:

n = 160

Records in foreign language:

n = 16
